# Supplementary material for: A comparison of pre and post-operative vedaprofen with ketoprofen for pain control in dogs
Source: PubMed Central journal article supplement (PMC4324799; doi:10.1186/s12917-015-0338-4), 2015-02-07
Supplement: 12917_2015_338_MOESM2_ESM.pdf [file 12917_2015_338_MOESM2_ESM.pdf]

Date \_\_\_\_\_

Time \_\_\_\_\_

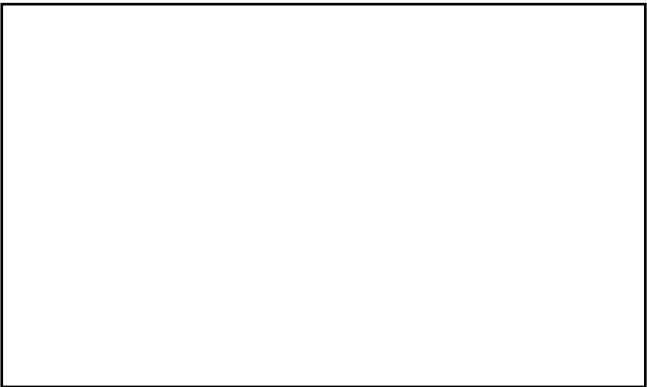

Colorado State University  
Veterinary Medical Center  
**Canine Acute Pain Scale**

Rescore when awake

- Animal is sleeping, but can be aroused - Not evaluated for pain
- Animal can't be aroused, check vital signs, assess therapy

| Pain Score | Example                                                                             | Psychological & Behavioral                                                                                                                                                                                                                                                                                                                                                                                                                                                                                                                 | Response to Palpation                                                                                                                                                                                                                                                                                    | Body Tension                                                                                          |
|------------|-------------------------------------------------------------------------------------|--------------------------------------------------------------------------------------------------------------------------------------------------------------------------------------------------------------------------------------------------------------------------------------------------------------------------------------------------------------------------------------------------------------------------------------------------------------------------------------------------------------------------------------------|----------------------------------------------------------------------------------------------------------------------------------------------------------------------------------------------------------------------------------------------------------------------------------------------------------|-------------------------------------------------------------------------------------------------------|
| 0          |    | <ul style="list-style-type: none"> <li><input type="checkbox"/> Comfortable when resting</li> <li><input type="checkbox"/> Happy, content</li> <li><input type="checkbox"/> Not bothering wound or surgery site</li> <li><input type="checkbox"/> Interested in or curious about surroundings</li> </ul>                                                                                                                                                                                                                                   | <ul style="list-style-type: none"> <li><input type="checkbox"/> Nontender to palpation of wound or surgery site, or to palpation elsewhere</li> </ul>                                                                                                                                                    | Minimal                                                                                               |
| 1          |    | <ul style="list-style-type: none"> <li><input type="checkbox"/> Content to slightly unsettled or restless</li> <li><input type="checkbox"/> Distracted easily by surroundings</li> </ul>                                                                                                                                                                                                                                                                                                                                                   | <ul style="list-style-type: none"> <li><input type="checkbox"/> Reacts to palpation of wound, surgery site, or other body part by looking around, flinching, or whimpering</li> </ul>                                                                                                                    | Mild                                                                                                  |
| 2          |  | <ul style="list-style-type: none"> <li><input type="checkbox"/> Looks uncomfortable when resting</li> <li><input type="checkbox"/> May whimper or cry and may lick or rub wound or surgery site when unattended</li> <li><input type="checkbox"/> Droopy ears, worried facial expression (arched eye brows, darting eyes)</li> <li><input type="checkbox"/> Reluctant to respond when beckoned</li> <li><input type="checkbox"/> Not eager to interact with people or surroundings but will look around to see what is going on</li> </ul> | <ul style="list-style-type: none"> <li><input type="checkbox"/> Flinches, whimpers cries, or guards/pulls away</li> </ul>                                                                                                                                                                                | Mild to Moderate<br><b>Reassess analgesic plan</b>                                                    |
| 3          |  | <ul style="list-style-type: none"> <li><input type="checkbox"/> Unsettled, crying, groaning, biting or chewing wound when unattended</li> <li><input type="checkbox"/> Guards or protects wound or surgery site by altering weight distribution (i.e., limping, shifting body position)</li> <li><input type="checkbox"/> May be unwilling to move all or part of body</li> </ul>                                                                                                                                                          | <ul style="list-style-type: none"> <li><input type="checkbox"/> May be subtle (shifting eyes or increased respiratory rate) if dog is too painful to move or is stoic</li> <li><input type="checkbox"/> May be dramatic, such as a sharp cry, growl, bite or bite threat, and/or pulling away</li> </ul> | Moderate<br><b>Reassess analgesic plan</b>                                                            |
| 4          |  | <ul style="list-style-type: none"> <li><input type="checkbox"/> Constantly groaning or screaming when unattended</li> <li><input type="checkbox"/> May bite or chew at wound, but unlikely to move</li> <li><input type="checkbox"/> Potentially unresponsive to surroundings</li> <li><input type="checkbox"/> Difficult to distract from pain</li> </ul>                                                                                                                                                                                 | <ul style="list-style-type: none"> <li><input type="checkbox"/> Cries at non-painful palpation (may be experiencing allodynia, wind-up, or fearful that pain could be made worse)</li> <li><input type="checkbox"/> May react aggressively to palpation</li> </ul>                                       | Moderate to Severe<br><b>May be rigid to avoid painful movement</b><br><b>Reassess analgesic plan</b> |

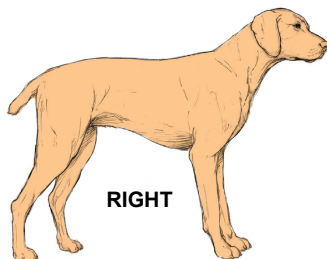

RIGHT

- Tender to palpation
- Warm
- Tense

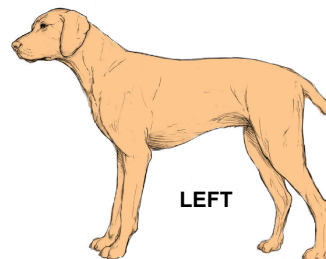

LEFT

Comments \_\_\_\_\_
